# Supplementary material for: Characterization of lectin binding affinities via direct LC-MS profiling: implications for glycopeptide enrichment and separation strategies
Source: Royal Society of Chemistry journal article supplement (doi:10.1039/c6an02043g), 2016-11-10
Supplement: c6an02043g1.pdf [file c6an02043g1.pdf]

Table S1

| Glyco peptide | Glycan form                                           | Possible structures                                                                                                                                                                                                                                                                                                                                                                                                                                 |
|---------------|-------------------------------------------------------|-----------------------------------------------------------------------------------------------------------------------------------------------------------------------------------------------------------------------------------------------------------------------------------------------------------------------------------------------------------------------------------------------------------------------------------------------------|
| 2,3           | Man <sub>5</sub> GlcNAc <sub>2</sub>                  | $\begin{array}{c} \text{Man } \alpha 1 \text{---} 6 \\ \text{Man } \alpha 1 \text{---} 3 \text{---} \text{Man } \alpha 1 \text{---} 6 \\ \text{Man } \alpha 1 \text{---} 3 \text{---} \text{Man } \beta 1 \text{---} 4 \text{GlcNAc } \beta 1 \text{---} 4 \text{GlcNAc} \\ \text{Man } \alpha 1 \end{array}$                                                                                                                                       |
| 4,5           | Man <sub>6</sub> GlcNAc <sub>2</sub>                  | $\begin{array}{c} \text{Man } \alpha 1 \text{---} 6 \\ \text{Man } \alpha 1 \text{---} 3 \text{---} \text{Man } \alpha 1 \text{---} 6 \\ \text{Man } \alpha 1 \text{---} 2 \text{---} \text{Man } \alpha 1 \text{---} 3 \text{---} \text{Man } \beta 1 \text{---} 4 \text{GlcNAc } \beta 1 \text{---} 4 \text{GlcNAc} \end{array}$                                                                                                                  |
| 6,7           | Man <sub>7</sub> GlcNAc <sub>2</sub>                  | $\begin{array}{c} \text{Man } \alpha 1 \left\{ \begin{array}{l} 2 \text{Man } \alpha 1 \text{---} 6 \\ 2 \text{Man } \alpha 1 \text{---} 3 \end{array} \right. \text{---} \text{Man } \alpha 1 \text{---} 6 \\ \text{Man } \alpha 1 \text{---} 3 \text{---} \text{Man } \beta 1 \text{---} 4 \text{GlcNAc } \beta 1 \text{---} 4 \text{GlcNAc} \\ 2 \text{Man } \alpha 1 \text{---} 2 \text{Man } \alpha 1 \end{array}$                             |
| 8,9           | Man <sub>8</sub> GlcNAc <sub>2</sub>                  | $\begin{array}{c} \text{Man } \alpha 1 \left\{ \begin{array}{l} 2 \text{Man } \alpha 1 \text{---} 6 \\ 2 \text{Man } \alpha 1 \text{---} 3 \end{array} \right. \text{---} \text{Man } \alpha 1 \text{---} 6 \\ \text{Man } \alpha 1 \text{---} 3 \text{---} \text{Man } \beta 1 \text{---} 4 \text{GlcNAc } \beta 1 \text{---} 4 \text{GlcNAc} \\ 2 \text{Man } \alpha 1 \text{---} 2 \text{Man } \alpha 1 \end{array}$                             |
| 10            | Man <sub>3</sub> GlcNAc <sub>2</sub>                  | $\begin{array}{c} \text{Man } \alpha 1 \text{---} 6 \\ \text{Man } \alpha 1 \text{---} 3 \text{---} \text{Man } \beta 1 \text{---} 4 \text{GlcNAc } \beta 1 \text{---} 4 \text{GlcNAc} \end{array}$                                                                                                                                                                                                                                                 |
| 11            | Man <sub>3</sub> GlcNAc <sub>5</sub>                  | $\begin{array}{c} \text{GlcNAc } \beta 1 \text{---} 2 \text{Man } \alpha 1 \text{---} 6 \\ \text{GlcNAc } \beta 1 \text{---} 2 \text{Man } \alpha 1 \text{---} 3 \text{---} \text{GlcNAc } \beta 1 \text{---} 4 \text{Man } \beta 1 \text{---} 4 \text{GlcNAc } \beta 1 \text{---} 4 \text{GlcNAc} \end{array}$                                                                                                                                     |
|               |                                                       | $\begin{array}{c} \text{Man } \alpha 1 \text{---} 6 \\ \text{GlcNAc } \beta 1 \text{---} 4 \text{---} \text{GlcNAc } \beta 1 \text{---} 4 \text{Man } \beta 1 \text{---} 4 \text{GlcNAc } \beta 1 \text{---} 4 \text{GlcNAc} \\ \text{GlcNAc } \beta 1 \text{---} 2 \text{---} \text{Man } \alpha 1 \text{---} 3 \end{array}$                                                                                                                       |
| 12            | Man <sub>3</sub> GlcNAc <sub>6</sub>                  | $\begin{array}{c} \text{GlcNAc } \beta 1 \text{---} 2 \text{Man } \alpha 1 \text{---} 6 \\ \text{GlcNAc } \beta 1 \text{---} 4 \text{---} \text{GlcNAc } \beta 1 \text{---} 4 \text{Man } \beta 1 \text{---} 4 \text{GlcNAc } \beta 1 \text{---} 4 \text{GlcNAc} \\ \text{GlcNAc } \beta 1 \text{---} 2 \text{---} \text{Man } \alpha 1 \text{---} 3 \end{array}$                                                                                   |
|               |                                                       | $\begin{array}{c} \text{GlcNAc } \beta 1 \text{---} 4 \text{---} \text{Man } \alpha 1 \text{---} 6 \\ \text{GlcNAc } \beta 1 \text{---} 2 \text{---} \text{GlcNAc } \beta 1 \text{---} 4 \text{Man } \beta 1 \text{---} 4 \text{GlcNAc } \beta 1 \text{---} 4 \text{GlcNAc} \\ \text{GlcNAc } \beta 1 \text{---} 2 \text{---} \text{Man } \alpha 1 \text{---} 3 \end{array}$                                                                        |
| 13            | Gal <sub>1</sub> Man <sub>3</sub> GlcNAc <sub>6</sub> | $\begin{array}{c} \text{Gal } \beta 1 \left\{ \begin{array}{l} 4 \text{GlcNAc } \beta 1 \text{---} 2 \text{Man } \alpha 1 \text{---} 6 \\ 4 \text{GlcNAc } \beta 1 \text{---} 4 \text{---} \text{GlcNAc } \beta 1 \text{---} 4 \text{Man } \beta 1 \text{---} 4 \text{GlcNAc } \beta 1 \text{---} 4 \text{GlcNAc} \\ 4 \text{GlcNAc } \beta 1 \text{---} 2 \text{---} \text{Man } \alpha 1 \text{---} 3 \end{array} \right. \end{array}$            |
|               |                                                       | $\begin{array}{c} \text{Gal } \beta 1 \left\{ \begin{array}{l} 4 \text{GlcNAc } \beta 1 \text{---} 4 \text{---} \text{Man } \alpha 1 \text{---} 6 \\ 4 \text{GlcNAc } \beta 1 \text{---} 2 \text{---} \text{GlcNAc } \beta 1 \text{---} 4 \text{Man } \beta 1 \text{---} 4 \text{GlcNAc } \beta 1 \text{---} 4 \text{GlcNAc} \\ 4 \text{GlcNAc } \beta 1 \text{---} 2 \text{---} \text{Man } \alpha 1 \text{---} 3 \end{array} \right. \end{array}$ |

| Glyco peptide | Glycan form                                                              | Possible structures                                                                                                                                                                                                                                                                                                                                                                                                      |
|---------------|--------------------------------------------------------------------------|--------------------------------------------------------------------------------------------------------------------------------------------------------------------------------------------------------------------------------------------------------------------------------------------------------------------------------------------------------------------------------------------------------------------------|
| 14            | Man <sub>3</sub> GlcNAc <sub>7</sub>                                     | $\begin{array}{l} \text{GlcNAc } \beta 1-6 \\ \text{GlcNAc } \beta 1-4\text{Man } \alpha 1-6 \\ \text{GlcNAc } \beta 1-2 \\ \text{GlcNAc } \beta 1-4\text{Man } \beta 1-4\text{GlcNAc } \beta 1-4\text{GlcNAc} \\ \text{GlcNAc } \beta 1-2\text{Man } \alpha 1-3 \end{array}$                                                                                                                                            |
|               |                                                                          | $\begin{array}{l} \text{GlcNAc } \beta 1-4,6 \\ \text{GlcNAc } \beta 1-2\text{Man } \alpha 1-6 \\ \text{GlcNAc } \beta 1-4 \\ \text{GlcNAc } \beta 1-2\text{Man } \alpha 1-3 \end{array}$                                                                                                                                                                                                                                |
| 15            | Man <sub>3</sub> GlcNAc <sub>8</sub>                                     | $\begin{array}{l} \text{GlcNAc } \beta 1-6 \\ \text{GlcNAc } \beta 1-4\text{Man } \alpha 1-6 \\ \text{GlcNAc } \beta 1-2 \\ \text{GlcNAc } \beta 1-4\text{Man } \beta 1-4\text{GlcNAc } \beta 1-4\text{GlcNAc} \\ \text{GlcNAc } \beta 1-2\text{Man } \alpha 1-3 \end{array}$                                                                                                                                            |
| 16            | Gal <sub>1</sub> Man <sub>3</sub> GlcNAc <sub>8</sub>                    | $\begin{array}{l} \text{Gal } \beta 1- \\ \left\{ \begin{array}{l} 4\text{GlcNAc } \beta 1-6 \\ 4\text{GlcNAc } \beta 1-4\text{Man } \alpha 1-6 \\ 4\text{GlcNAc } \beta 1-2 \\ 4\text{GlcNAc } \beta 1-4\text{Man } \alpha 1-3 \\ 4\text{GlcNAc } \beta 1-2 \end{array} \right. \\ \text{GlcNAc } \beta 1-4\text{Man } \beta 1-4\text{GlcNAc } \beta 1-4\text{GlcNAc} \end{array}$                                      |
| 17,<br>19-21  | Xyl <sub>1</sub> Man <sub>3</sub> Fuc <sub>1</sub> GlcNAc <sub>2</sub>   | $\begin{array}{l} \text{Man } \alpha 1-6 \\ \text{Man } \alpha 1-3\text{Man } \beta 1-4\text{GlcNAc } \beta 1-4\text{GlcNAc} \\ \text{Man } \alpha 1-2 \\ \text{Xyl } \beta 1 \\ \text{Fuc } \alpha 1-3\text{GlcNAc} \end{array}$                                                                                                                                                                                        |
| 18            | Xyl <sub>1</sub> Man <sub>3</sub> GlcNAc <sub>2</sub>                    | $\begin{array}{l} \text{Man } \alpha 1-6 \\ \text{Man } \alpha 1-3\text{Man } \beta 1-4\text{GlcNAc } \beta 1-4\text{GlcNAc} \\ \text{Man } \alpha 1-2 \\ \text{Xyl } \beta 1 \end{array}$                                                                                                                                                                                                                               |
| 22            | NeuAc <sub>3</sub> Gal <sub>3</sub> Man <sub>3</sub> GlcNAc <sub>5</sub> | $\begin{array}{l} \text{NeuAc } \alpha 2-3,6\text{Gal } \beta 1-4\text{GlcNAc } \beta 1-2\text{Man } \alpha 1-6 \\ \text{NeuAc } \alpha 2-3,6\text{Gal } \beta 1-4\text{GlcNAc } \beta 1-4\text{Man } \beta 1-4\text{GlcNAc } \beta 1-4\text{GlcNAc} \\ \text{NeuAc } \alpha 2-3,6\text{Gal } \beta 1-4\text{GlcNAc } \beta 1-2\text{Man } \alpha 1-3 \end{array}$                                                       |
| 23            | NeuAc <sub>4</sub> Gal <sub>3</sub> Man <sub>3</sub> GlcNAc <sub>5</sub> | $\begin{array}{l} \text{NeuAc } \alpha 2-3,6\text{Gal } \beta 1-4\text{GlcNAc } \beta 1-2\text{Man } \alpha 1-6 \\ \text{NeuAc } \alpha 2-3,6\text{GlcNAc } \beta 1-4\text{Man } \beta 1-4\text{GlcNAc } \beta 1-4\text{GlcNAc} \\ \text{NeuAc } \alpha 2-3,6\text{Gal } \beta 1-4\text{GlcNAc } \beta 1-4\text{Man } \alpha 1-3 \\ \text{NeuAc } \alpha 2-3,6\text{Gal } \beta 1-4\text{GlcNAc } \beta 1-2 \end{array}$ |
|               |                                                                          | $\begin{array}{l} \text{NeuAc } \alpha 2-3,6\text{Gal } \beta 1-4\text{GlcNAc } \beta 1-2\text{Man } \alpha 1-6 \\ \text{NeuAc } \alpha 2-3,6\text{Gal } \beta 1-4\text{GlcNAc } \beta 1-4\text{Man } \beta 1-4\text{GlcNAc } \beta 1-4\text{GlcNAc} \\ \text{NeuAc } \alpha 2-3,6\text{Gal } \beta 1-4\text{GlcNAc } \beta 1-2\text{Man } \alpha 1-3 \\ \text{NeuAc } \alpha 2-3,6 \end{array}$                         |
