# Supplementary material for: Characterization of lectin binding affinities via direct LC-MS profiling: implications for glycopeptide enrichment and separation strategies
Source: Royal Society of Chemistry journal article supplement (doi:10.1039/c6an02043g), 2016-11-10
Supplement: c6an02043g2.pdf [file c6an02043g2.pdf]

**Table S2:** Recovery rates for glycopeptides in different retention time windows

|                                             | m/z                  | glycan form                                           | Fractional recovery rate (c.a.) |               |               |               |              |               |               |               |
|---------------------------------------------|----------------------|-------------------------------------------------------|---------------------------------|---------------|---------------|---------------|--------------|---------------|---------------|---------------|
|                                             |                      |                                                       | POROS                           |               |               |               | Tosoh        |               |               |               |
|                                             |                      |                                                       | 9.5-22.0 min                    | 10.2-22.0 min | 11.0-22.0 min | 12.0-22.0 min | 9.5-22.0 min | 10.2-22.0 min | 11.0-22.0 min | 12.0-22.0 min |
| averaged trace of the non-modified peptides |                      | N/A                                                   | 0.39                            | 0.22          | 0.15          | 0.11          | 0.17         | 0.12          | 0.09          | 0.07          |
| glycopeptides                               | 923.0 <sup>2+</sup>  | GlcNAc1                                               | 0.98                            | 0.77          | 0.19          | 0.00          | N/A          |               |               |               |
|                                             | 846.4 <sup>2+</sup>  | Man <sub>5</sub> GlcNAc <sub>2</sub>                  | 0.99                            | 0.94          | 0.30          | 0.02          | 0.98         | 0.97          | 0.95          | 0.92          |
|                                             | 927.4 <sup>2+</sup>  | Man <sub>5</sub> GlcNAc <sub>2</sub>                  | 0.98                            | 0.98          | 0.64          | 0.05          | 0.98         | 0.97          | 0.95          | 0.92          |
|                                             | 1008.4 <sup>2+</sup> | Man <sub>7</sub> GlcNAc <sub>2</sub>                  | 0.99                            | 0.97          | 0.58          | 0.09          | 0.94         | 0.92          | 0.88          | 0.83          |
|                                             | 1089.5 <sup>2+</sup> | Man <sub>5</sub> GlcNAc <sub>2</sub>                  | 0.99                            | 0.99          | 0.89          | 0.23          | 0.98         | 0.97          | 0.96          | 0.94          |
|                                             | 994.4 <sup>2+</sup>  | Man <sub>3</sub> GlcNAc <sub>2</sub>                  | 0.99                            | 0.99          | 0.99          | 0.99          | 0.94         | 0.91          | 0.87          | 0.83          |
|                                             | 1299.1 <sup>2+</sup> | Man <sub>3</sub> GlcNAc <sub>5</sub>                  | 1.00                            | 1.00          | 1.00          | 1.00          | 0.96         | 0.95          | 0.93          | 0.90          |
|                                             | 1400.6 <sup>2+</sup> | Man <sub>5</sub> GlcNAc <sub>6</sub>                  | 0.98                            | 0.99          | 0.98          | 0.69          | 0.97         | 0.95          | 0.91          | 0.82          |
|                                             | 1481.6 <sup>2+</sup> | Gal <sub>1</sub> Man <sub>5</sub> GlcNAc <sub>6</sub> | 0.97                            | 0.99          | 0.92          | 0.69          | 0.95         | 0.92          | 0.87          | 0.78          |
|                                             | 1502.1 <sup>2+</sup> | Man <sub>7</sub> GlcNAc <sub>7</sub>                  | 0.98                            | 0.99          | 0.89          | 0.72          | 0.97         | 0.95          | 0.92          | 0.84          |
|                                             | 1603.7 <sup>2+</sup> | Man <sub>7</sub> GlcNAc <sub>8</sub>                  | 0.99                            | 0.99          | 0.96          | 0.70          | 0.97         | 0.95          | 0.90          | 0.80          |
|                                             | 1684.7 <sup>2+</sup> | Gal <sub>1</sub> Man <sub>7</sub> GlcNAc <sub>8</sub> | 0.99                            | 0.99          | 0.96          | 0.77          | 0.94         | 0.91          | 0.86          | 0.76          |
